# Supplementary material
Source: PubMed Central journal article supplement (PMC5538188)

**Figure S6****A**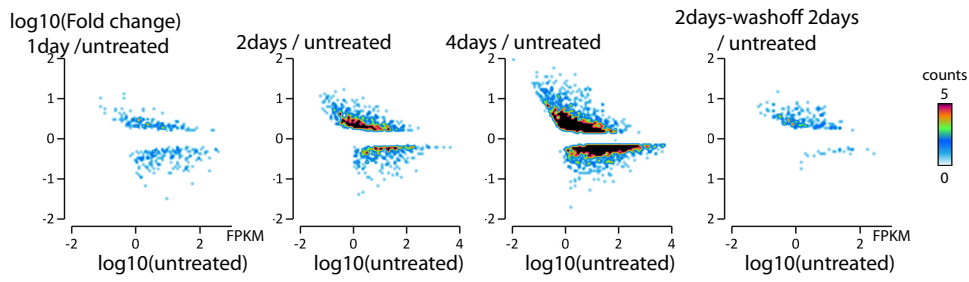**B****Genomic separation to super-enhancers**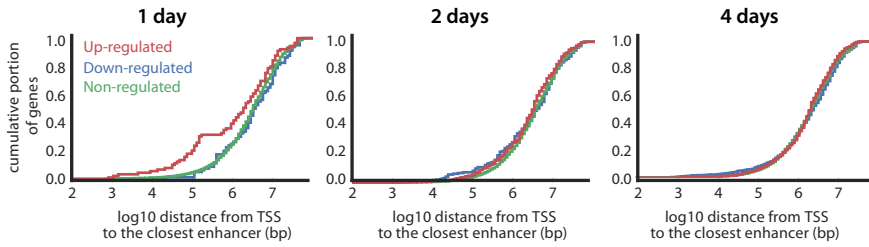**C****Boundaries separating TSS from neighboring super-enhancers**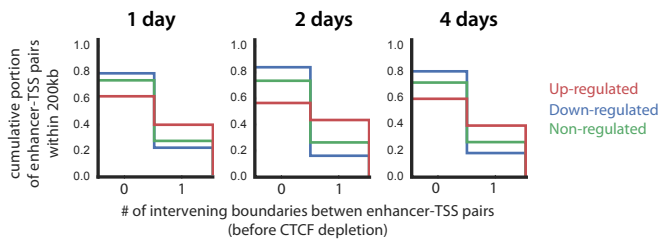**D****Genomic Distance between TSSs and Smc1a HiChIP loop anchors**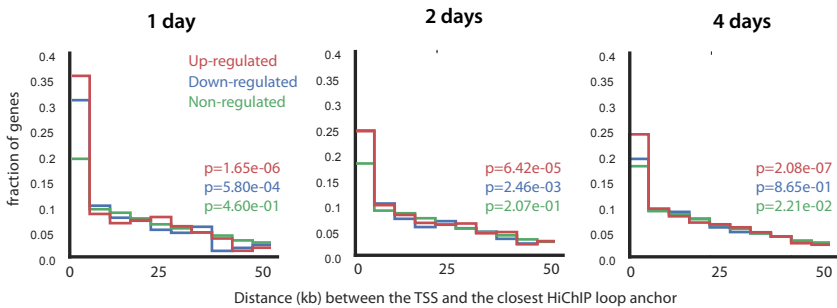**E****Genomic Distance between TSSs and nearest boundary for genes remaining up-regulated after CTCF restoration**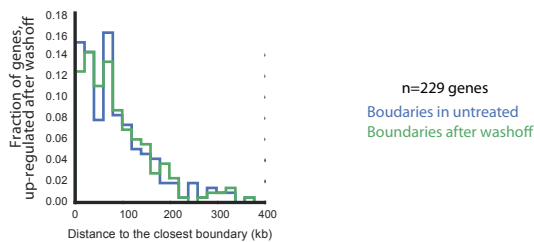

Supplement: NIHMS873912-supplement-6.pdf [file NIHMS873912-supplement-6.pdf]
