# Supplementary material
Source: PubMed Central journal article supplement (PMC5538188)

**Figure S7****A H3K27me3 around all CTCF peaks**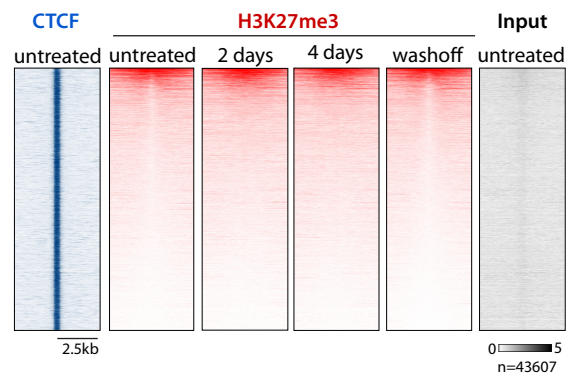**B H3K27me3 density at H3K27me3 peaks identified in untreated**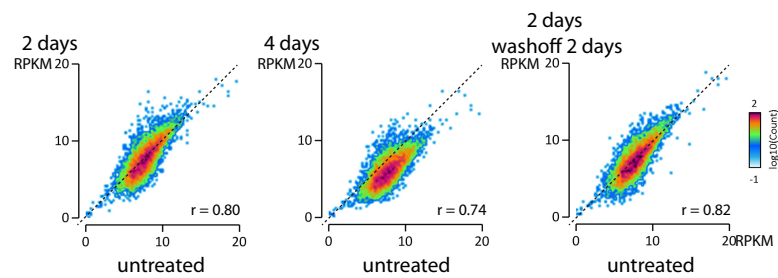**C Example locus**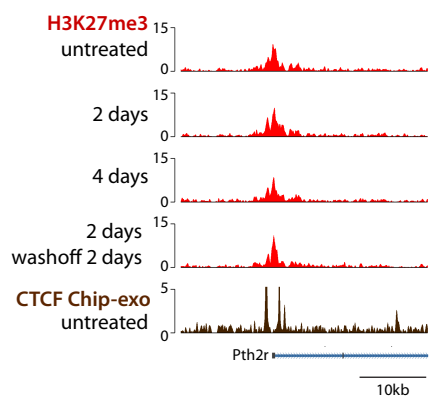**D Example locus**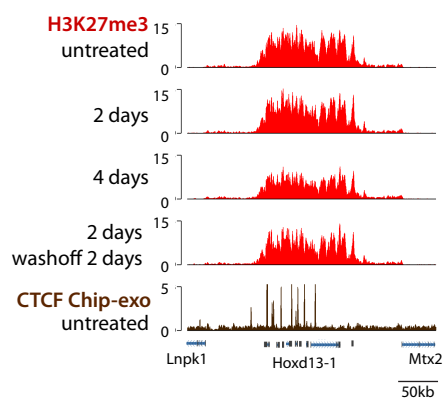

Supplement: NIHMS873912-supplement-7.pdf [file NIHMS873912-supplement-7.pdf]
