# Supplementary material
Source: PubMed Central journal article supplement (PMC5538188)

**Figure S2**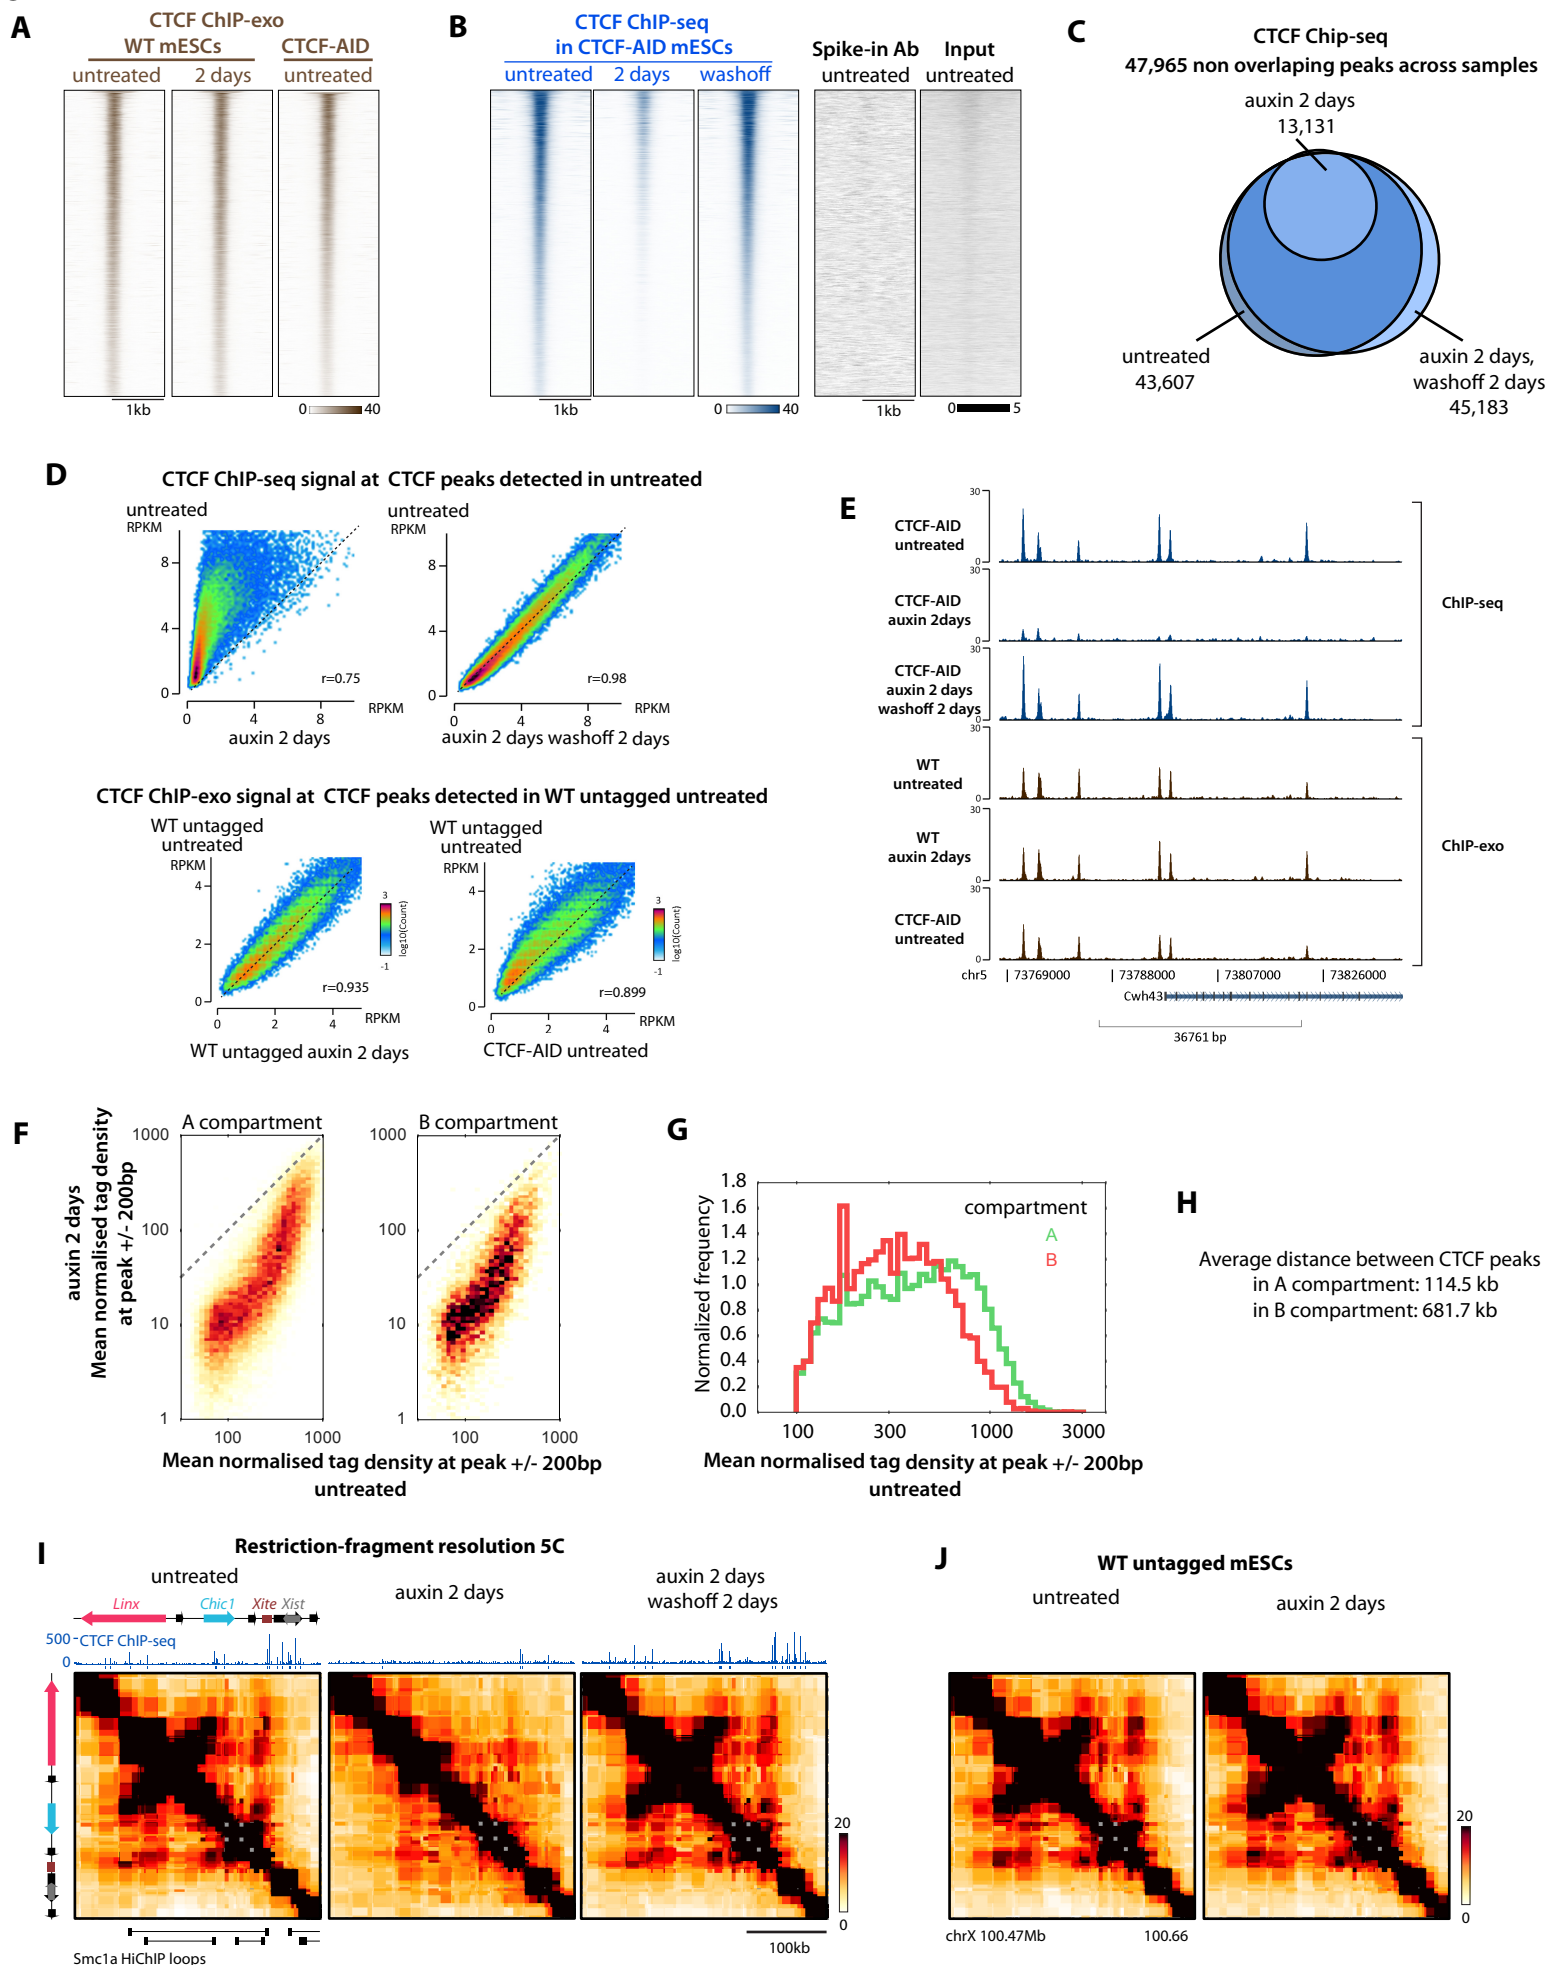

Supplement: NIHMS873912-supplement-2.pdf [file NIHMS873912-supplement-2.pdf]

**Figure S3**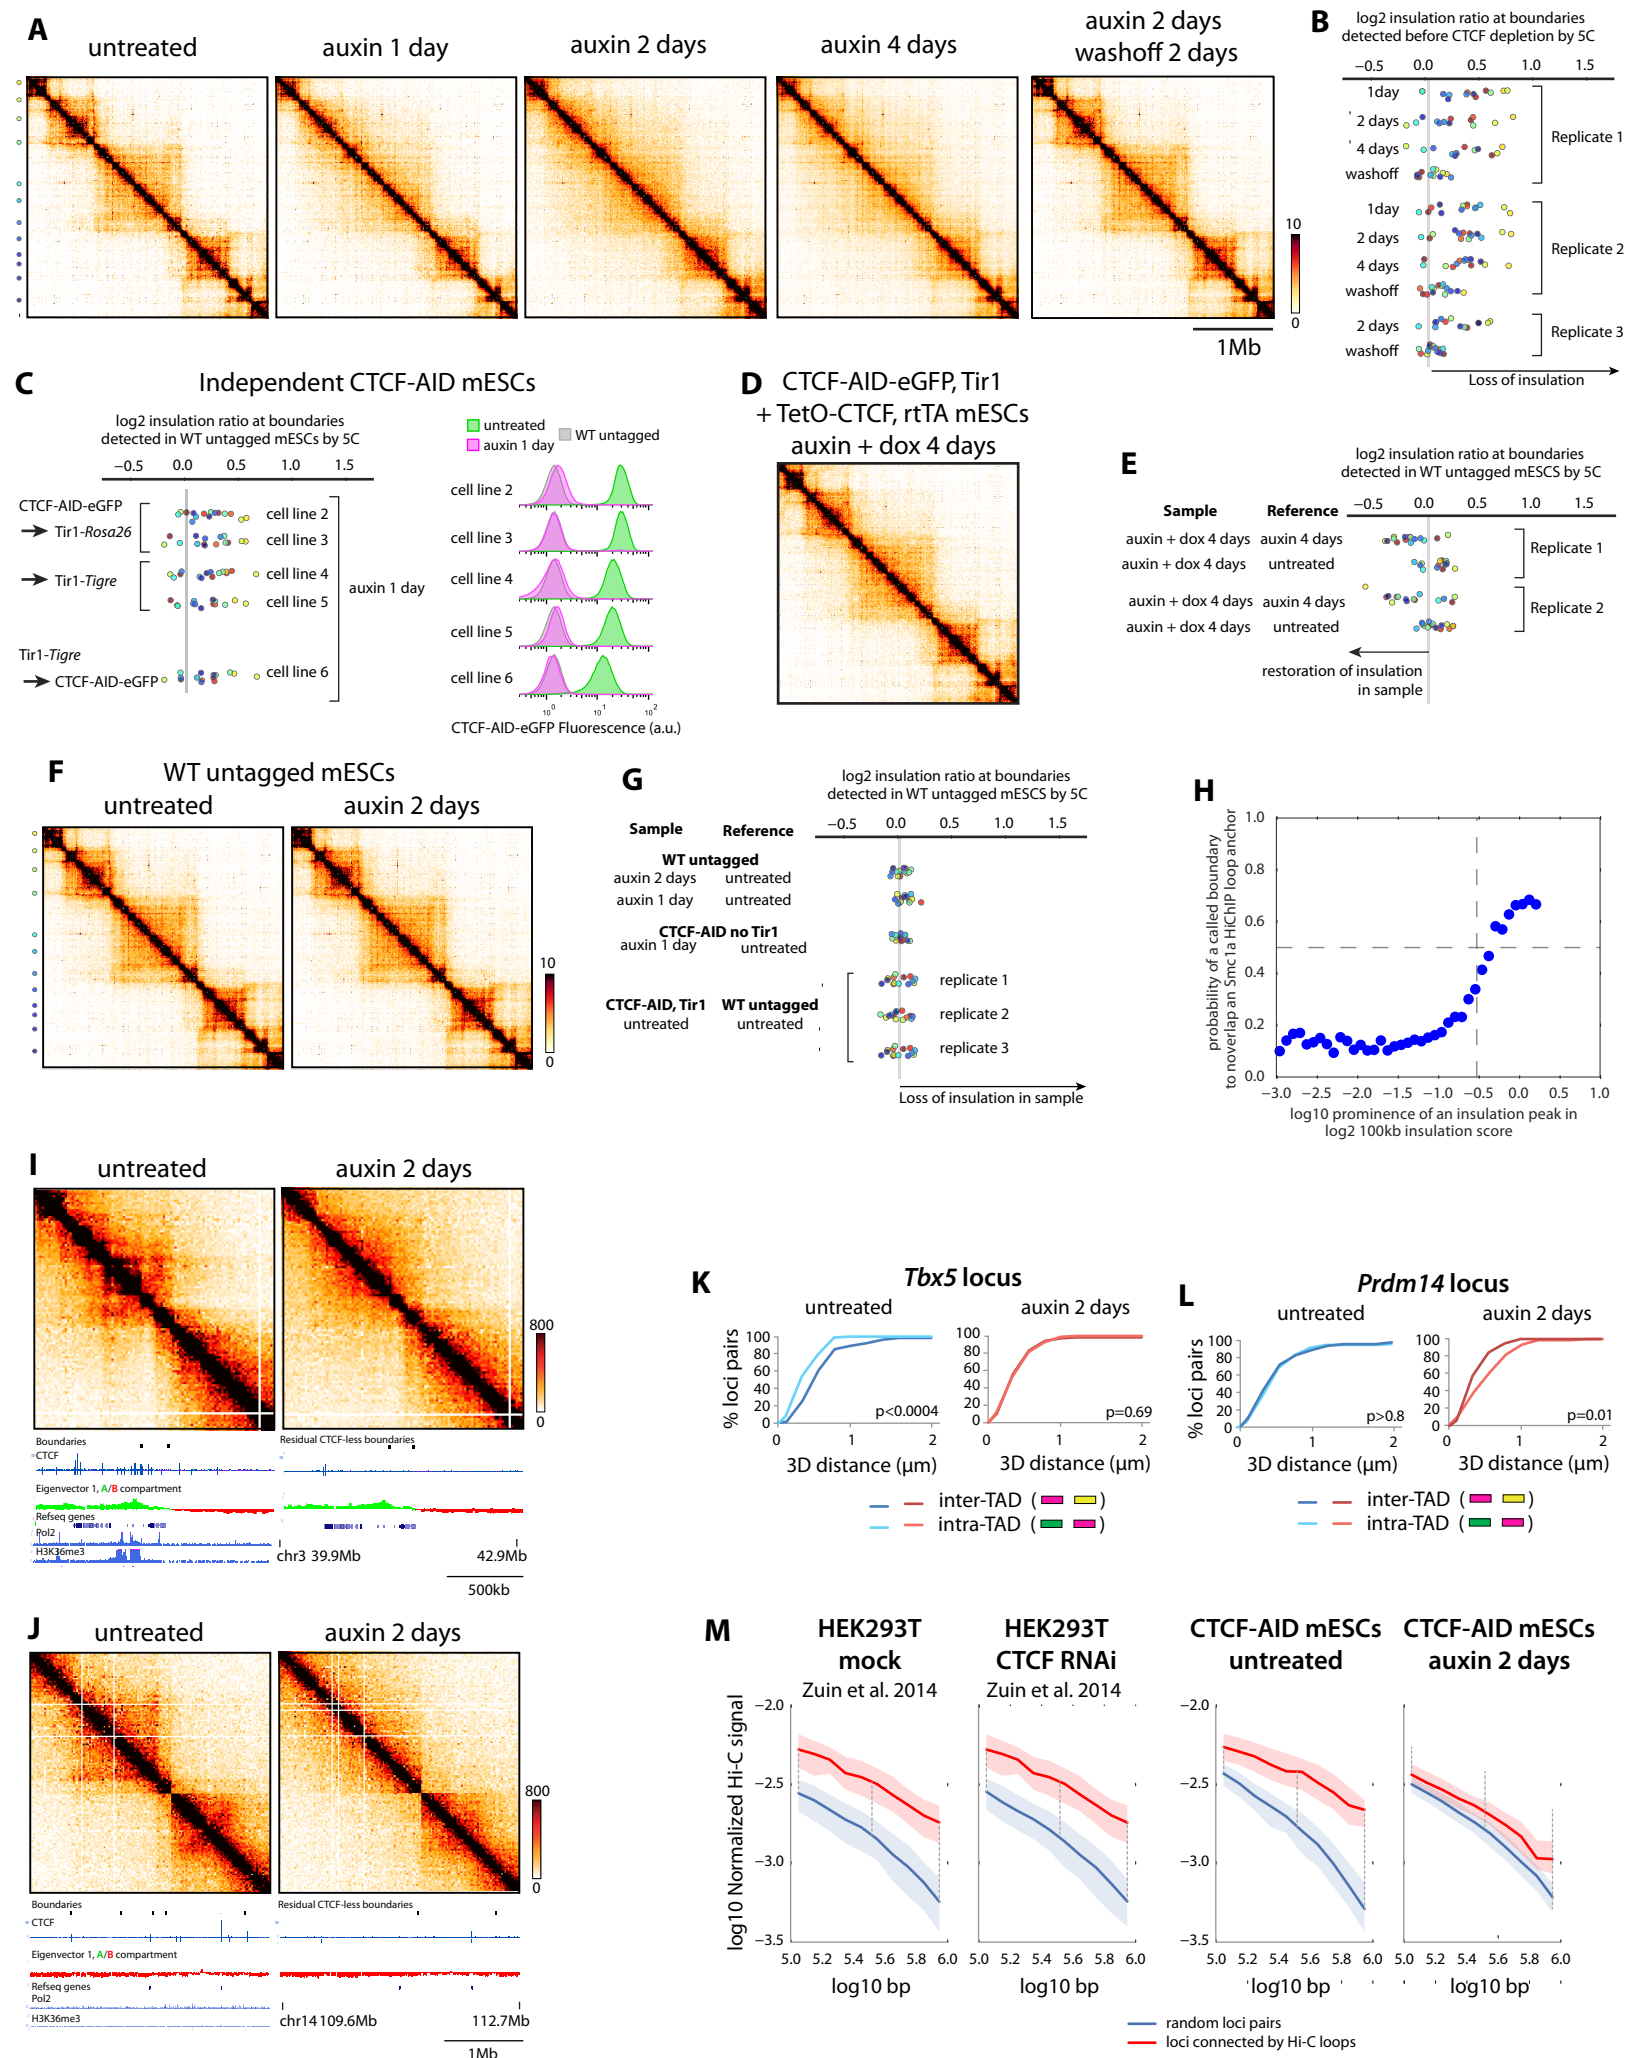

Supplement: NIHMS873912-supplement-3.pdf [file NIHMS873912-supplement-3.pdf]

**Figure S4**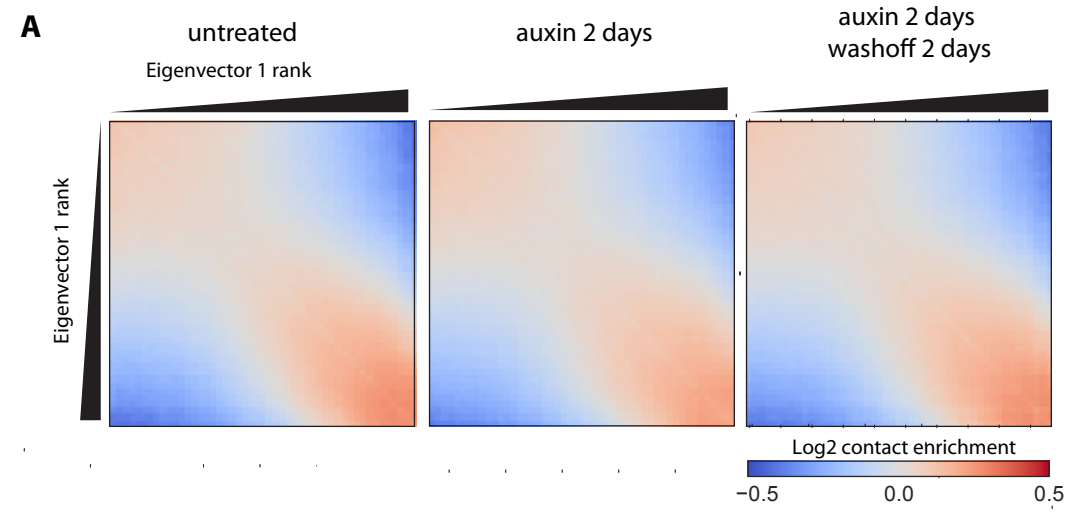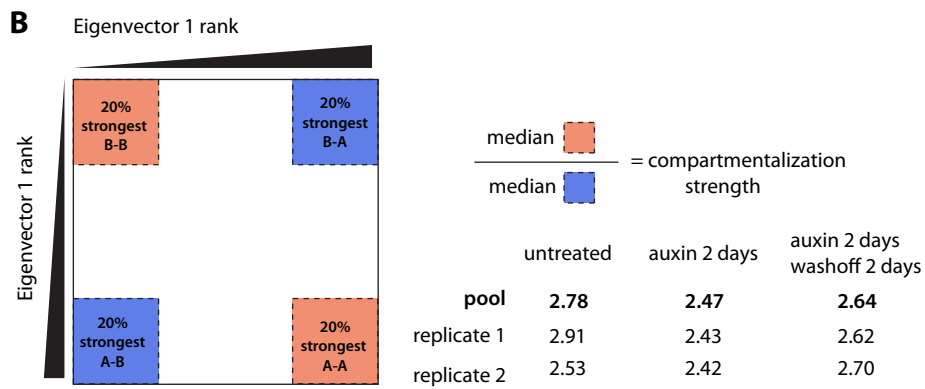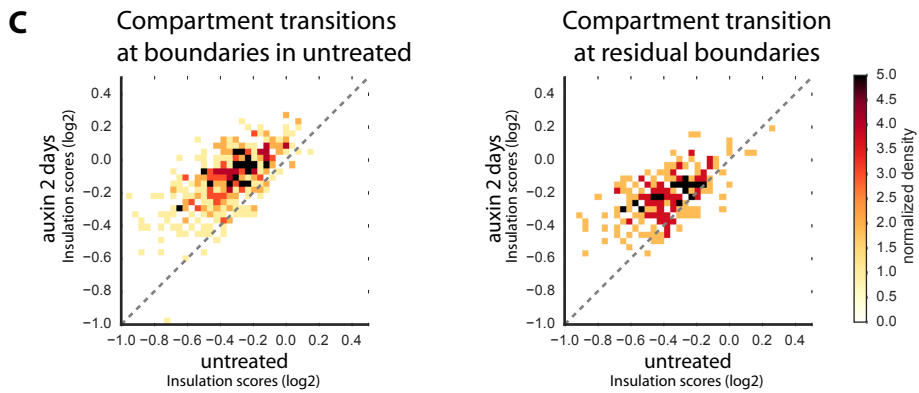

Supplement: NIHMS873912-supplement-4.pdf [file NIHMS873912-supplement-4.pdf]

**Figure S5**

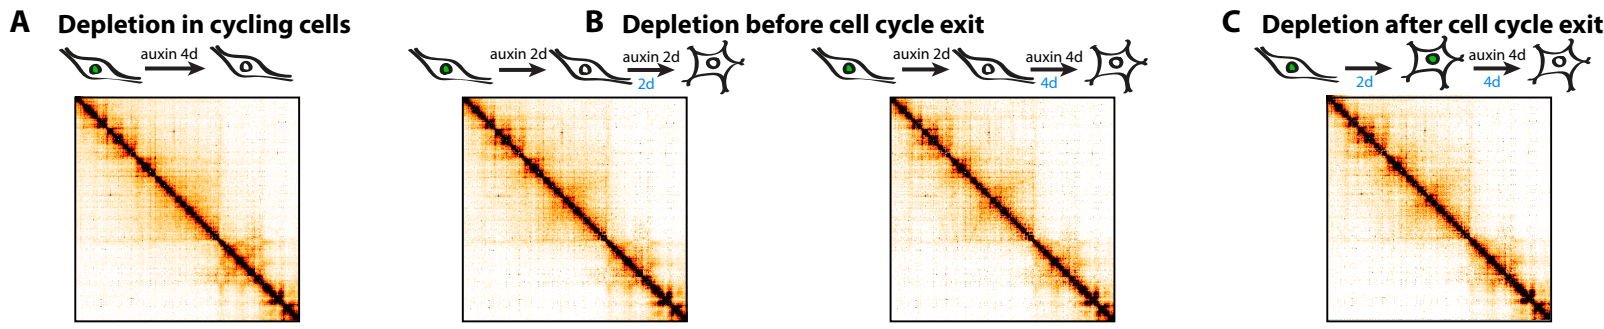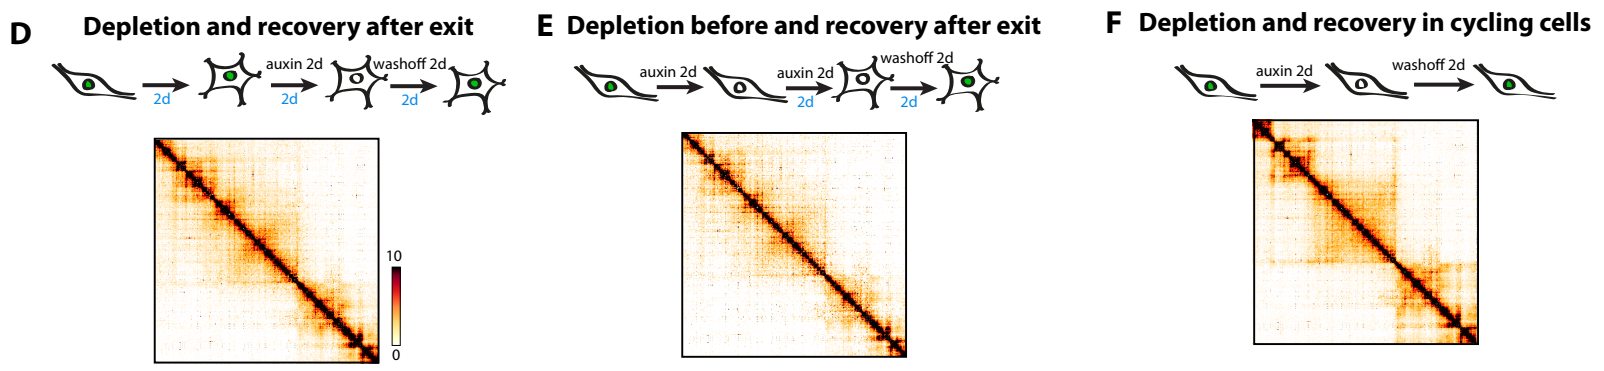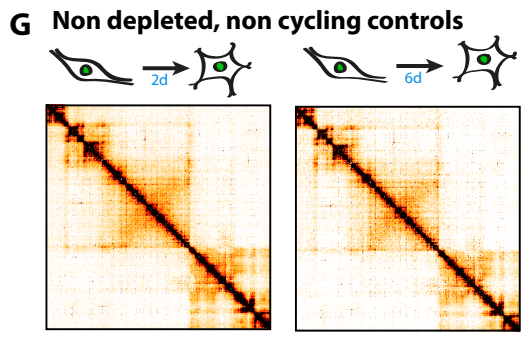

**H Summary of depletion schemes in NPCs and astrocytes**

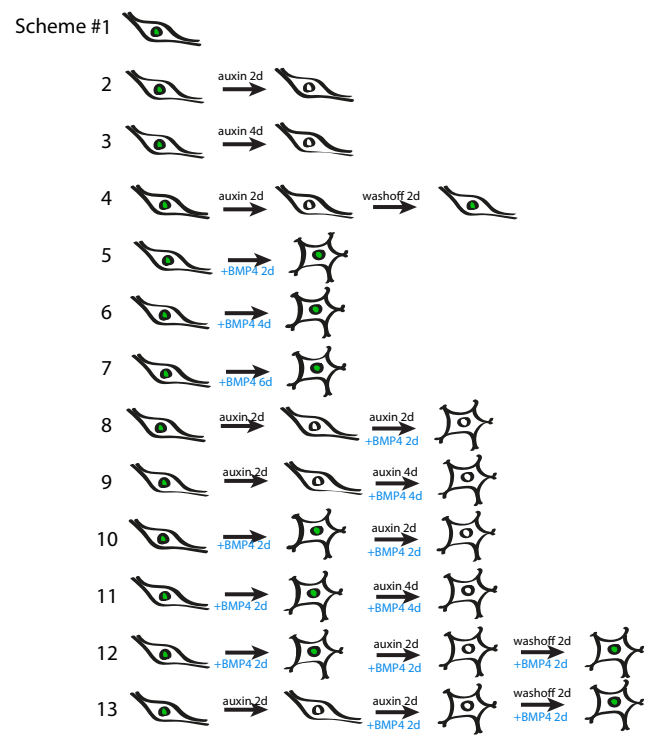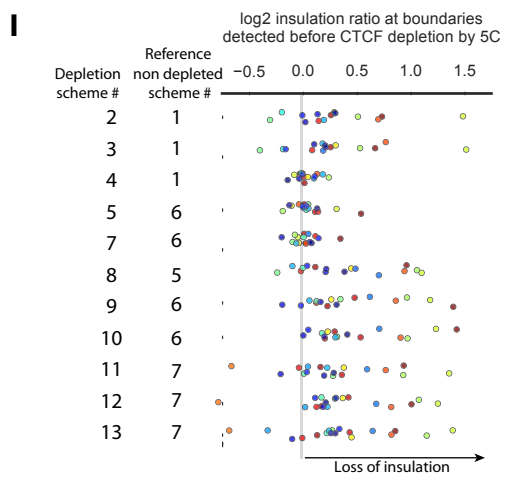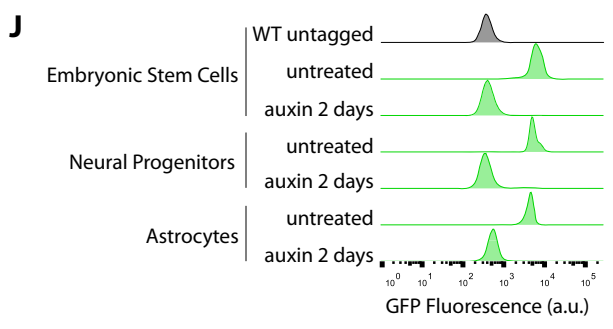

Supplement: NIHMS873912-supplement-5.pdf [file NIHMS873912-supplement-5.pdf]
